# Supplementary material for: Übelkeit und Erbrechen müssen nicht sein
Source: Springer Nature journal article supplement (doi:10.1007/s00058-022-2209-2), 2022-02-01
Supplement: MOESM1 [file 20095900]

## Literatur

### zum Beitrag „Übelkeit und Erbrechen müssen nicht sein“ von Matthias Naegele

*Heilberufe (74) 2/2022, S. 12-14*

1. Arbeitsgemeinschaft der Wissenschaftlichen Medizinischen Fachgesellschaften e.V. (AWMF) DK e. V (DKG) und DK (DKH) (2016) S3-Leitlinie Supportive Therapie bei onkologischen PatientInnen
2. National Cancer Institute (2017) Common Terminology Criteria for Adverse Events (CTCAE) Version 5.0.  
[https://ctep.cancer.gov/protocoldevelopment/electronic\\_applications/docs/CTCAE\\_v5\\_Quick\\_Reference\\_5x7.pdf](https://ctep.cancer.gov/protocoldevelopment/electronic_applications/docs/CTCAE_v5_Quick_Reference_5x7.pdf). Accessed 5 Sep 2020
3. Olver IN, Elliott JA, Koczwara B (2014) A qualitative study investigating chemotherapy-induced nausea as a symptom cluster. *Support Care Cancer* 22:2749–2756. <https://doi.org/10.1007/s00520-014-2276-2>
4. Navari RM, Apro M (2016) Antiemetic Prophylaxis for Chemotherapy-Induced Nausea and Vomiting. *New England Journal of Medicine* 374:1356–1367.  
<https://doi.org/10.1056/NEJMra1515442>
5. Roscoe JA, Morrow GR, Apro MS, et al (2011) Anticipatory nausea and vomiting. *Support Care Cancer* 19:1533–1538. <https://doi.org/10.1007/s00520-010-0980-0>
6. Jordan K, Jahn F, Feyer P, et al (2019) Antiemese bei medikamentöser Tumorthherapie. <https://www.onkopedia.com/de/onkopedia/guidelines/antiemese-bei-medikamentoeser-tumorthherapie/@@guideline/html/index.html>. Accessed 1 Dec 2020
7. Roila F, Molassiotis A, Herrstedt J, et al (2016) 2016 MASCC and ESMO guideline update for the prevention of chemotherapy- and radiotherapy-induced nausea and vomiting and of nausea and vomiting in advanced cancer patients. *Ann Oncol* 27:v119–v133. <https://doi.org/10.1093/annonc/mdw270>
8. Ryan JL, Heckler CE, Roscoe JA, et al (2012) Ginger (*Zingiber officinale*) reduces acute chemotherapy-induced nausea: a URCC CCOP study of 576 patients. *Supportive Care in Cancer* 20:1479–1489. <https://doi.org/10.1007/s00520-011-1236-3>
9. Roscoe JA, O'Neill M, Jean-Pierre P, et al (2010) An Exploratory Study on the Effects of an Expectancy Manipulation on Chemotherapy-Related Nausea. *Journal of Pain and Symptom Management* 40:379–390.  
<https://doi.org/10.1016/j.jpainsymman.2009.12.024>
10. Colagiuri B, Zachariae R (2010) Patient Expectancy and Post-chemotherapy Nausea: A Meta-analysis. *Annals of Behavioral Medicine* 40:3–14.  
<https://doi.org/10.1007/s12160-010-9186-4>
11. Shelke AR, Roscoe JA, Morrow GR, et al (2008) Effect of a Nausea Expectancy Manipulation on Chemotherapy-Induced Nausea: A University of Rochester Cancer Center Community Clinical Oncology Program Study. *Journal of Pain and Symptom Management* 35:381–387.  
<https://doi.org/10.1016/j.jpainsymman.2007.05.008>
