# Supplementary material for: Übelkeit und Erbrechen müssen nicht sein
Source: Springer Nature journal article supplement (doi:10.1007/s00058-022-2209-2), 2022-02-01
Supplement: MOESM2 [file 20095900]

## Tabelle 2

zum Beitrag „Übelkeit und Erbrechen müssen nicht sein“  
von Matthias Naegele

Heilberufe (74) 2/2022, S. 12-14

Übersicht über die gebräuchlichsten Antiemetika die Einnahmeschemata:

| Arzneimittel                                                 | Applikation                 | Empfohlene Tagesdosis                                                  |
|--------------------------------------------------------------|-----------------------------|------------------------------------------------------------------------|
| <b>5-HT3-Rezeptor-Antagonisten</b>                           |                             |                                                                        |
| Granisetron                                                  | p.o.<br>i.v.<br>transdermal | 2mg<br>1mg<br>3,1mg                                                    |
| Ondansetron                                                  | p.o.<br>i.v.                | 16mg<br>8mg                                                            |
| Tropisetron                                                  | p.o.<br>i.v.                | 5mg<br>5mg                                                             |
| Palonosetron                                                 | i.v.                        | 0,25mg                                                                 |
| <b>NK1-Rezeptor-Antagonisten</b>                             |                             |                                                                        |
| Aprepitant                                                   | p.o.                        | 125mg (Tag 1), 80mg (Tag 2&3)                                          |
| Fosaprepitant                                                | i.v.                        | 150mg                                                                  |
| Netupitant (nur in Kombination mit Palonosetron)             | p.o.                        | 300mg (und 0,5mg Palonosetron)                                         |
| Rolaprepitant                                                | p.o.                        | 180mg                                                                  |
| <b>Dexamethason</b>                                          |                             |                                                                        |
| Bei hoch emetogener Therapie                                 | p.o./i.v.                   | 12mg (mit NK1-RA, Tag 1)<br>20mg (ohne NK1-RA, Tag 1)<br>8mg (Tag 2&3) |
| Moderat emetogen                                             | p.o./i.v.                   | 8mg (1-3 Tage)                                                         |
| Gering emetogen                                              | p.o./i.v.                   | 4-8mg                                                                  |
| <b>Neuroleptika und andere Dopamin-Rezeptor-Antagonisten</b> |                             |                                                                        |
| Olanzapin                                                    | p.o.                        | 1x 5mg                                                                 |
| Haloperidol                                                  | p.o.                        | 1-3x 1mg                                                               |
| Metoclopramid                                                | p.o.                        | 3x 10mg                                                                |

Angelehnt an Jordan et al. 2019
